# Supplementary material for: Efficient separation of photoexcited carriers in a g-C3N4-decorated WO3 nanowire array heterojunction as the cathode of a rechargeable Li–O2 battery
Source: Royal Society of Chemistry journal article supplement (doi:10.1039/d0nr04956e), 2020-01-01
Supplement: d0nr04956e1.pdf [file d0nr04956e1.pdf]

**Supporting Information for**

**Efficient separation of photoexcited carriers in g-C<sub>3</sub>N<sub>4</sub>-decorated WO<sub>3</sub>  
nanowires array heterojunction as the cathode of rechargeable Li-O<sub>2</sub>  
battery**

Hairong Xue,<sup>#a</sup> Tao Wang,<sup>#,\*a</sup> Yaya Feng,<sup>a</sup> Hao Gong,<sup>a</sup> Xiaoli Fan,<sup>a</sup> Bin Gao,<sup>a</sup> Yulong Kong,<sup>a</sup>  
Cheng Jiang,<sup>a</sup> Songtao Zhang,<sup>b</sup> Xianli Huang,<sup>a</sup> Jianping He<sup>\*a</sup>

<sup>a</sup> College of Materials Science and Technology, Jiangsu Key Laboratory of Electrochemical Energy Storage Technologies, Nanjing University of Aeronautics and Astronautics, 29 Yudao Street, 210016 Nanjing, P. R. China.

<sup>b</sup> Testing Center, Yangzhou University, 225009 Yangzhou, P. R. China.

E-mail: wangtao0729@nuaa.edu.cn, jianph@nuaa.edu.cn

<sup>#</sup> These authors contributed equally to this work.

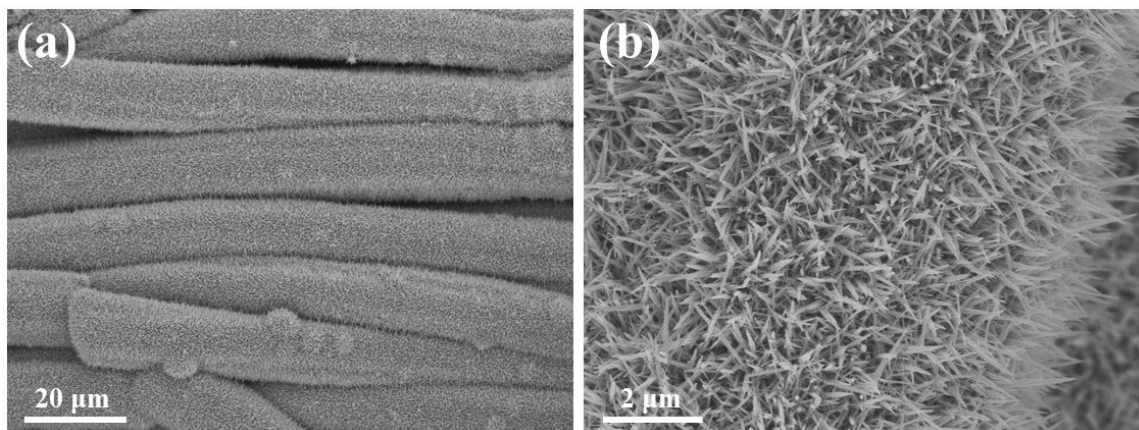

**Fig. S1** SEM image of the W-precursor NWs before heat treatment: (a) low-magnification, (b) high-magnification.

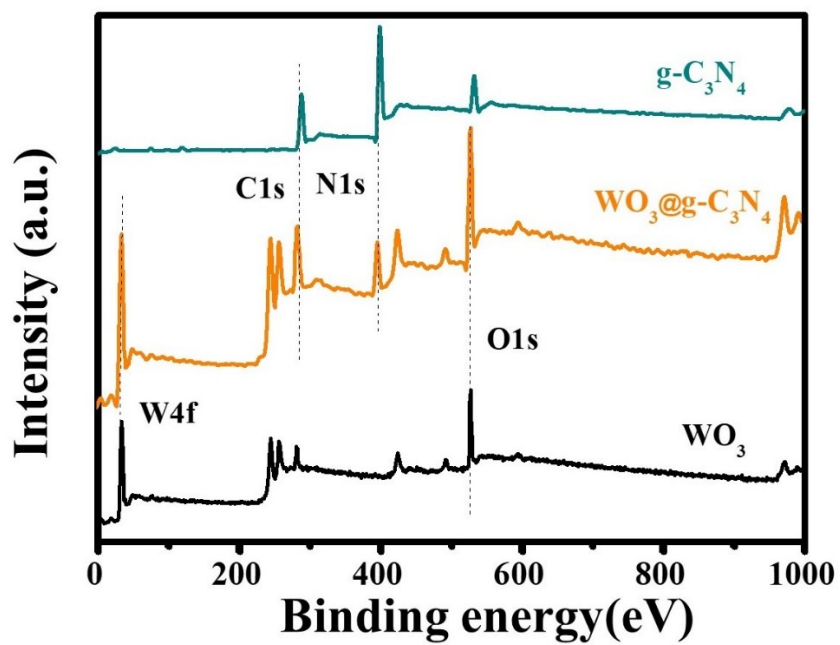

**Fig. S2** XPS spectra of WO<sub>3</sub> NWA, g-C<sub>3</sub>N<sub>4</sub> and WO<sub>3</sub>@g-C<sub>3</sub>N<sub>4</sub> NWA.

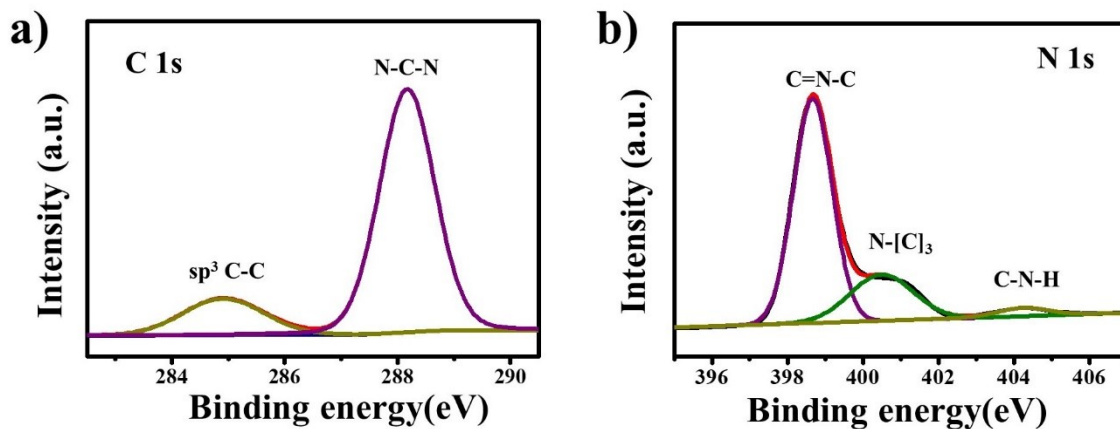

**Fig. S3** High-resolution XPS spectra of g-C<sub>3</sub>N<sub>4</sub>: (a) C 1s, (b) N 1s.

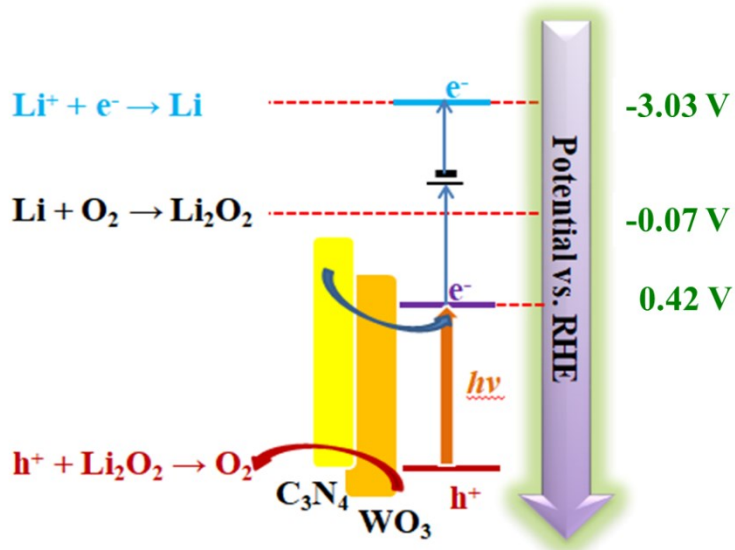

**Fig. S4** The potential diagram of the photo-involved Li-O<sub>2</sub> batteries using WO<sub>3</sub>@g-C<sub>3</sub>N<sub>4</sub> NWA cathode

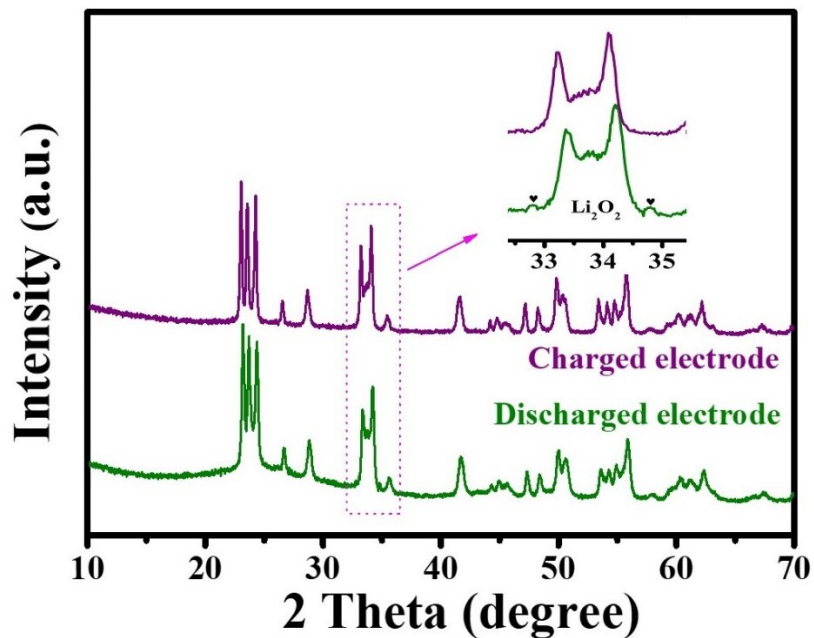

Fig. S5 XRD curves of discharged and recharged  $\text{WO}_3@g\text{-C}_3\text{N}_4$  NWA cathode.

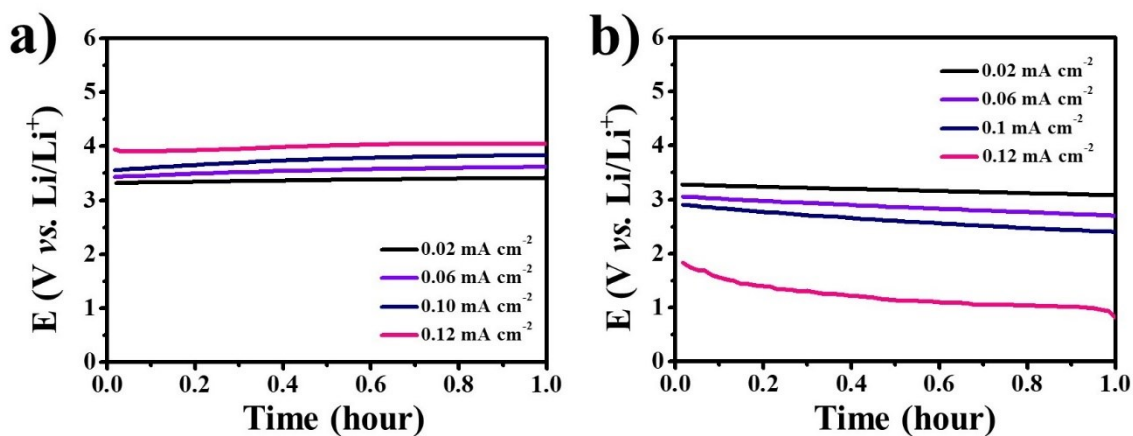

Fig. S6 The rate performance of the  $\text{WO}_3$  NWA-based photo-involved  $\text{Li-O}_2$  battery at the current densities form 0.06, 0.10, 0.12 and 0.14  $\text{mA cm}^{-2}$ : (a) charging process, (b) discharging process.

**Table S1.** Charging Voltage of the  $\text{WO}_3@\text{g-C}_3\text{N}_4$  heterojunction cathode in this paper, compared with some other traditional Li-O<sub>2</sub> batteries.

| Reference | Type of material                                         | Charge Voltage (vs. Li/Li <sup>+</sup> ) |
|-----------|----------------------------------------------------------|------------------------------------------|
| This work | $\text{WO}_3@\text{g-C}_3\text{N}_4$ NWA                 | 3.69 V                                   |
| 1         | MoS <sub>2</sub> /CNTS                                   | ~4.0 V                                   |
| 2         | $\alpha\text{-MnO}_2$                                    | ~4.0 V                                   |
| 3         | self-nitrogen-doped porous carbon                        | ~4.0 V                                   |
| 4         | $\text{C}_x\text{N}_y$ particles@N-doped porous graphene | ~4.1 V                                   |
| 5         | MnO <sub>2</sub> /carbon array-type                      | ~4.0 V                                   |
| 6         | Co <sub>2</sub> P Nanosheets                             | ~4.25 V                                  |
| 7         | $\alpha\text{-MnO}_2$ nanorods/porous-carbon             | ~3.7 V                                   |

**Table S2.** Cycle numbers of the  $\text{WO}_3@\text{g-C}_3\text{N}_4$  heterojunction cathode in this paper, compared with some other photo-assisted Li-O<sub>2</sub> batteries.

| Reference | Type of material                         | Cycle numbers |
|-----------|------------------------------------------|---------------|
| This work | $\text{WO}_3@\text{g-C}_3\text{N}_4$ NWA | 100th         |
| 8         | ZnS                                      | 50th          |
| 9         | g-C <sub>3</sub> N <sub>4</sub>          | 50th          |
| 10        | TiO <sub>2</sub> /CT                     | 30th          |
| 11        | The dye-sensitized TiO <sub>2</sub>      | 25th          |

## References

1. A. Hu, J. Long, C. Shu, R. Liang and J. Li, *ACS Appl. Mater. Inter.*, 2018, **10**, 34077-34086.
2. C. Li, Z. Yu, H. Liu and L. Kong, *J. Mater. SCI.* 2018, **53**, 14525-14535.
3. M. Wang, Y. Yao, Z. Tang, T. Zhao, F. Wu, Y. Yang and Q. Huang, *ACS Appl. Mater. Inter.*, 2018, **10**, 32212-32219.
4. A. Wu, S. Shen, X. Yan, G. Xia, Y. Zhang, F. Zhu and J. Zhang, *Nanoscale*, 2018, **10**, 12763-12770.
5. F. Tu, Q. Wang, J. Xie, G. Cao, S. Zhang, J. Wang, S. Mao, X. Zhao and H. Yang, *Energy Storage Mater.*, 2017, **6**, 164-170.
6. H. Huang, S. Luo, C. Liu, T. Yi and Y. Zhai, *ACS Appl. Mater. Inter.*, 2018, **10**, 21281-21290.
7. Y. Qin, J. Lu, P. Du, Z. Chen, Y. Ren, T. Wu, J. T. Miller, J. Wen, D. J. Miller and Z. Zhang, *Energy Environ. Sci.*, 2013, **6**, 519-533.
8. Y. Liu, J. Yi, Y. Qiao, D. Wang, P. He, Q. Li, S. Wu and H. Zhou, *Energy Storage Mater.*, 2018, **11**, 170-175.
9. Y. Liu, N. Li, S. Wu, K. Liao, K. Zhu, J. Yi. and H. Zhou, *Energ. Environ. Sci.*, 2015, **8**, 2664-2667.
10. H. Gong, T. Wang, H. Xue, X. Fan, B. Gao, H. Zhang, L. Shi, J. He and J. Ye, *Energy Storage Mater.*, 2018, **13**, 49-56.
11. M. Z. Yu, X. D. Ren, L. Ma and Y. Y. Wu, *Nat. Commun.*, 2014, **5**, 5111-5116.
